# Supplementary material for: Small extracellular vesicles have distinct CD81 and CD9 tetraspanin expression profiles in plasma from rheumatoid arthritis patients
Source: PubMed Central journal article supplement (PMC10543154; doi:10.1007/s10238-023-01024-1), 2023-02-24
Supplement: 10238_2023_1024_MOESM1_ESM.pdf [file 10238_2023_1024_MOESM1_ESM.pdf]

## SUPPLEMENTARY MATERIAL

**Supplementary table 1.** Characteristics of RA patients. All RA patients were female, ACPA+ and former smokers.

| <i>RA patient</i> | <i>Age</i> | <i>BMI</i> | <i>Months on MTX</i> | <i>DAS28 at baseline</i> | <i>DAS28 at follow up</i> | $\Delta$ <i>DAS28</i> | <i>CRP at baseline</i> | <i>CRP at follow up</i> | <i>ESR at baseline</i> | <i>ESR at follow up</i> | <i>Response to MTX</i> |
|-------------------|------------|------------|----------------------|--------------------------|---------------------------|-----------------------|------------------------|-------------------------|------------------------|-------------------------|------------------------|
| 1                 | 72         | 24.8       | 2.5                  | 6.7                      | 2.6                       | 4.1                   | 112                    | 12                      | 74                     | 22                      | R                      |
| 2                 | 60         | 29.4       | 3.3                  | 4.7                      | 3.2                       | 1.5                   | 17                     | 4                       | 41                     | 26                      | R                      |
| 3                 | 50         | 28.2       | 3.9                  | 4.3                      | 2.1                       | 2.2                   | 2                      | 1                       | 42                     | 14                      | R                      |
| 4                 | 62         | 25.9       | 3.0                  | 5.6                      | 2.9                       | 2.7                   | 7                      | 8                       | 37                     | 23                      | R                      |
| 5                 | 68         | 23.8       | 2.7                  | 4.3                      | 4.5                       | -0.2                  | 3                      | 18                      | 29                     | 56                      | NR                     |
| 6                 | 65         | 27.4       | 3.2                  | 5.1                      | 5.2                       | -0.1                  | 23                     | 19                      | 47                     | 42                      | NR                     |
| 7                 | 66         | 25.2       | 3.4                  | 4.5                      | 4.5                       | 0                     | 4                      | 9                       | 20                     | 21                      | NR                     |
| 8                 | 50         | 29.8       | 4                    | 4.2                      | 4.1                       | 0.1                   | 19                     | 21                      | 17                     | 22                      | NR                     |

a)

Size Box Plot - All - Capture Probe: CD63

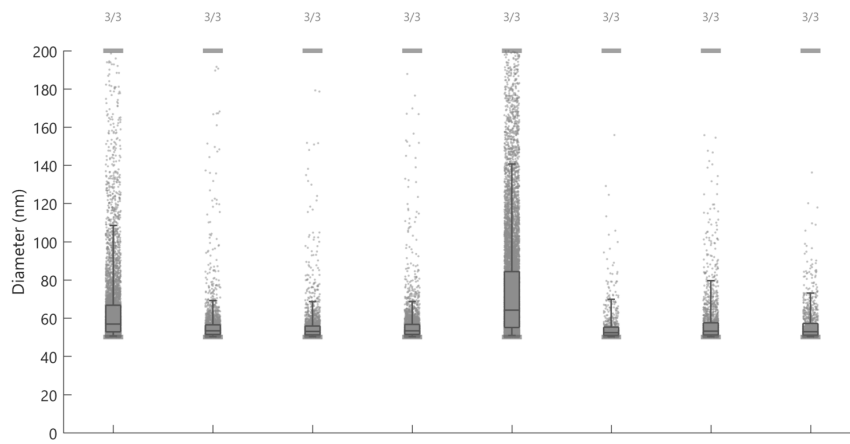

Size Box Plot - All - Capture Probe: CD81

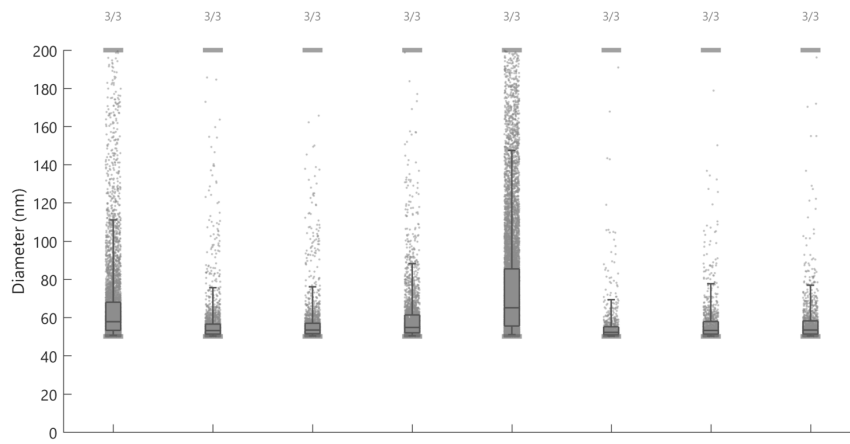

Size Box Plot - All - Capture Probe: CD9

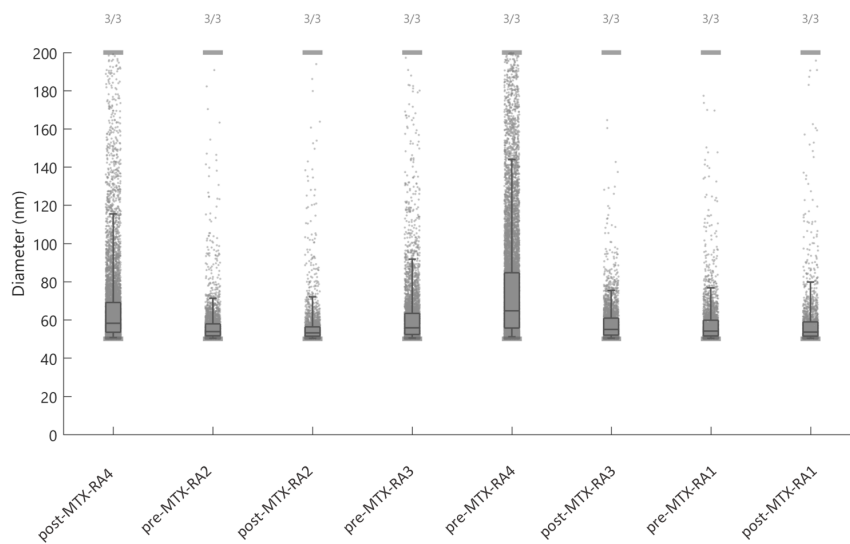

b)

Size Box Plot - All - Capture Probe: CD63

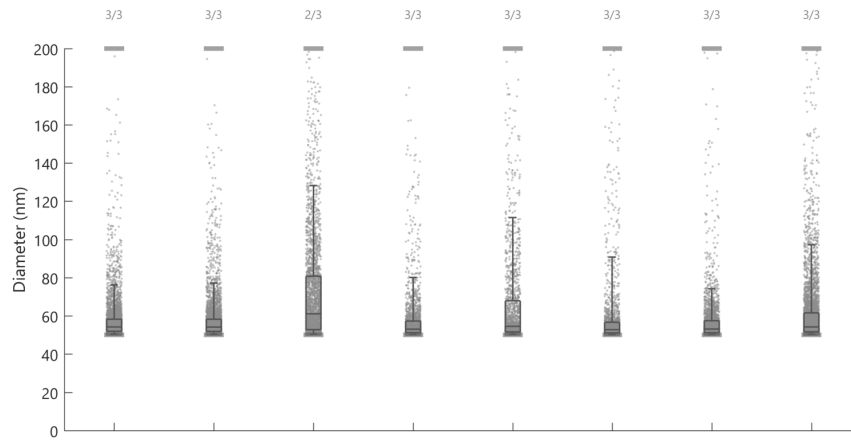

Size Box Plot - All - Capture Probe: CD81

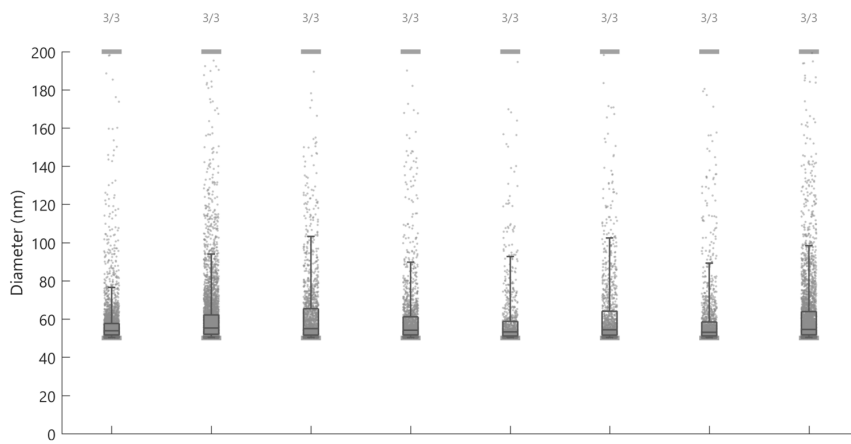

Size Box Plot - All - Capture Probe: CD9

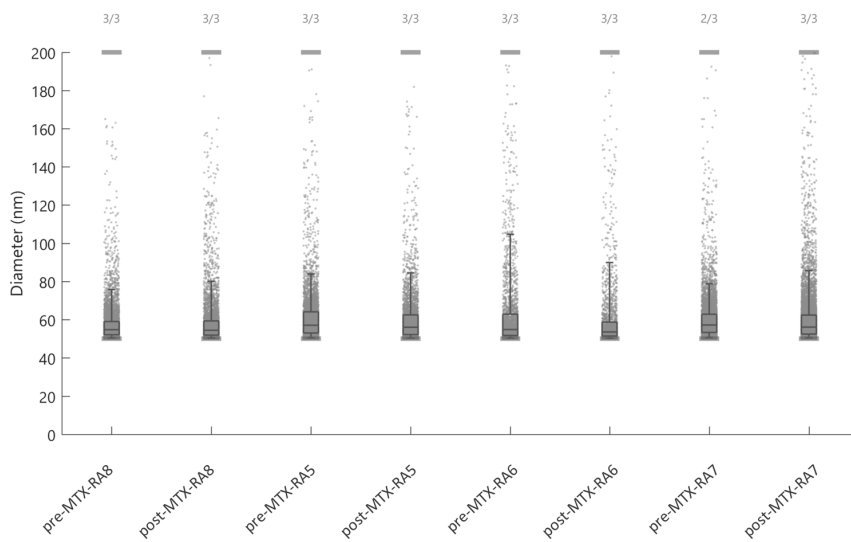

c)

Size Box Plot - All - Capture Probe: CD63

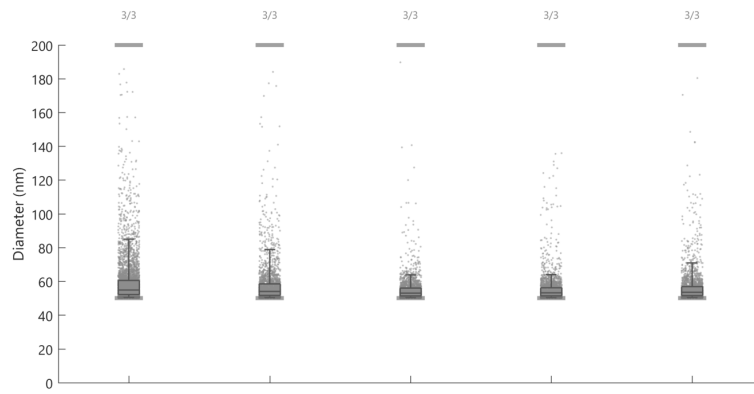

Size Box Plot - All - Capture Probe: CD81

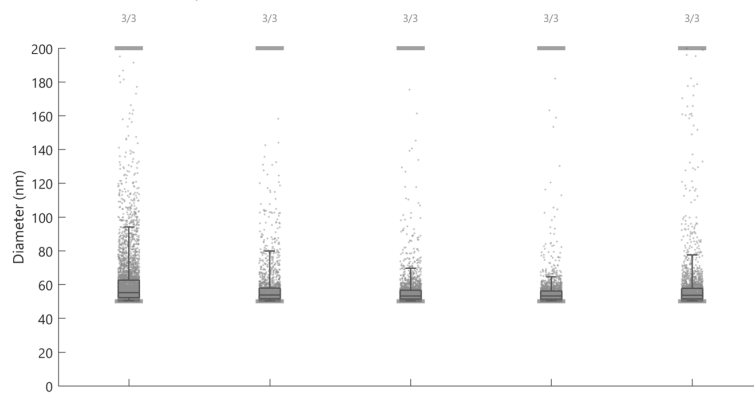

Size Box Plot - All - Capture Probe: CD9

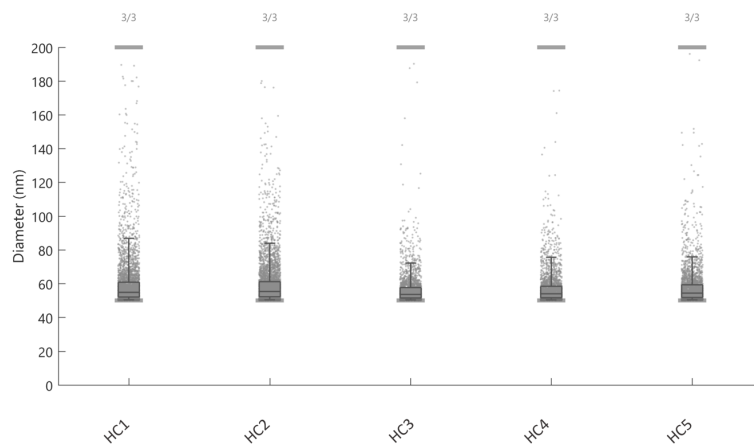

**Supplementary figure 1. Size distribution of sEVs captured by the ExoView chip. a) MTX-responders, b) MTX-non-responders and c) healthy controls.**

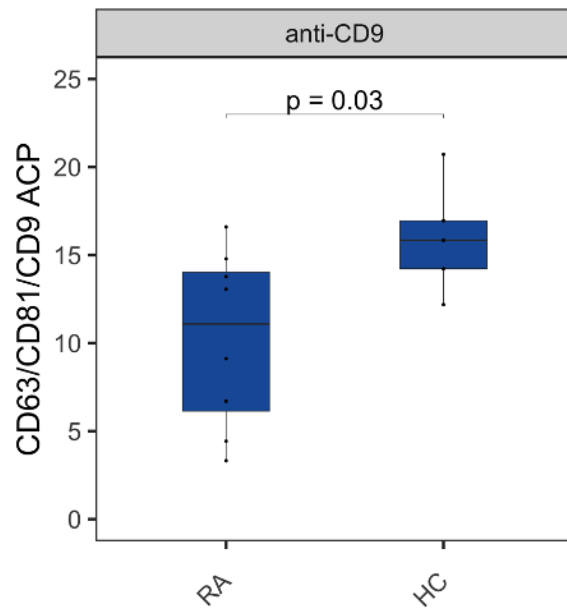

**Supplementary figure 2. Phenotypic analysis of triple positive sEVs captured by anti-CD9.** The average colocalization percent (ACP) sample mean of the two study phenotypes were compared using Welch's two samples t-test.
